# Supplementary material
Source: HighWire-hosted journal article supplement (doi:10.1101/rna.080913.125)
Supplement: Supplemental_Table_S1_qPCR_Primer_Sequences.xlsx [file Supplemental_Table_S1_qPCR_Primer_Sequences.xlsx]

## Sheet: Sheet1
Gene Name	Primer	Sequence	Species
IFNL1	Fwd	5′-CGCCTTGGAAGAGTCACTCA	Human
	Rev	5′-GAAGCCTCAGGTCCCAATTC	Human
IFNB1	Fwd	5′-GTCAGAGTGGAAATCCTAAG	Human
	Rev	5′-ACAGCATCTGCTGGTTGAAG	Human
	Fwd	5′-AGATGTCCTCAACTGCTCTC	Mouse
	Rev	5′-AGATTCACTACCAGTCCCAG	Mouse
IL1B	Fwd	5′- CCTCTGATGGGCAACCACTT	Mouse
	Rev	5′-TTCATCCCCCACACGTTGAC	Mouse
MX1	Fwd	5′-CAACTGGAATCCTCCTGGAA	Mouse
	Rev	5′-GGCTCTCCTCAGAGGTATCA	Mouse
CXCL10	Fwd	5′-CCTGCTGGGTCTGAGTGGGA	Mouse
	Rev	5′-GATAGGCTCGCAGGGATGAT	Mouse
ACTB	Fwd	5′-AGGTGACAGCATTGCTTCTG	Human
	Rev	5′-GCTGCCTCAACACCTCAAC	Human
	Fwd	5′-AGGTGACAGCATTGCTTCTG	Mouse
	Rev	5′-GCTGCCTCAACACCTCAAC	Mouse
GAPDH	Fwd	5′-CTCCCACTCTTCCACCTTCG	Human
	Rev	5′-CCACCACCCTGTTGCTGTAG	Human
	Fwd	5′-CTCCCACTCTTCCACCTTCG	Mouse
	Rev	5′-TCGCCCCACTTGATTTTGG	Mouse
